# Supplementary material for: Interspecific studies of circadian genes period and timeless in Drosophila
Source: PubMed Central journal article supplement (PMC5818170; doi:10.1016/j.gene.2018.01.020), 2018-03-30

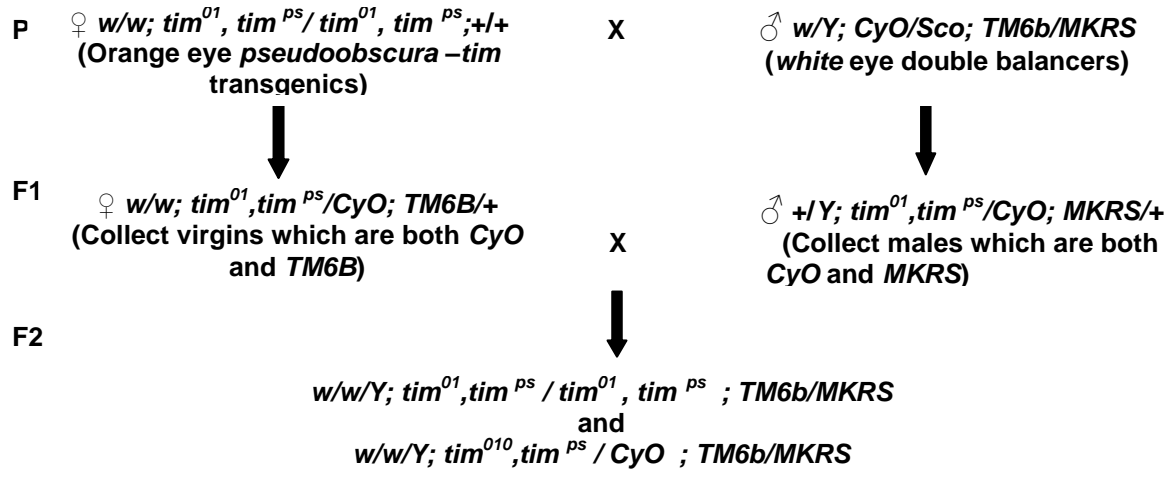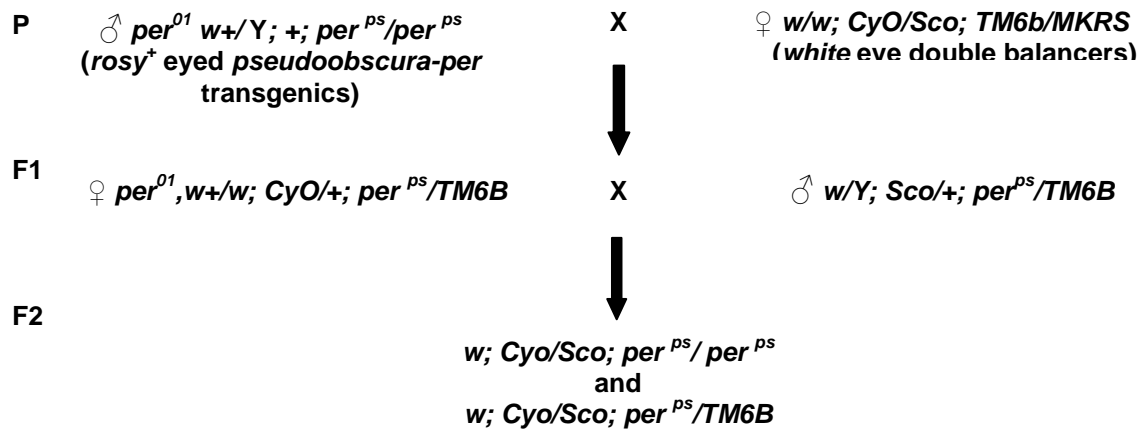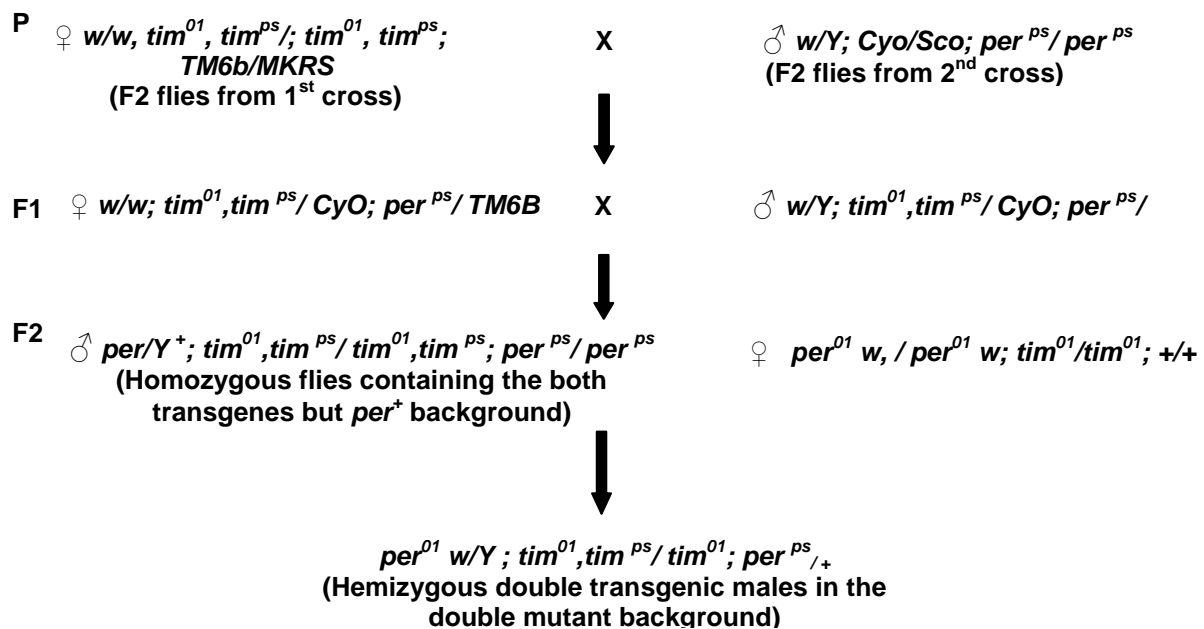

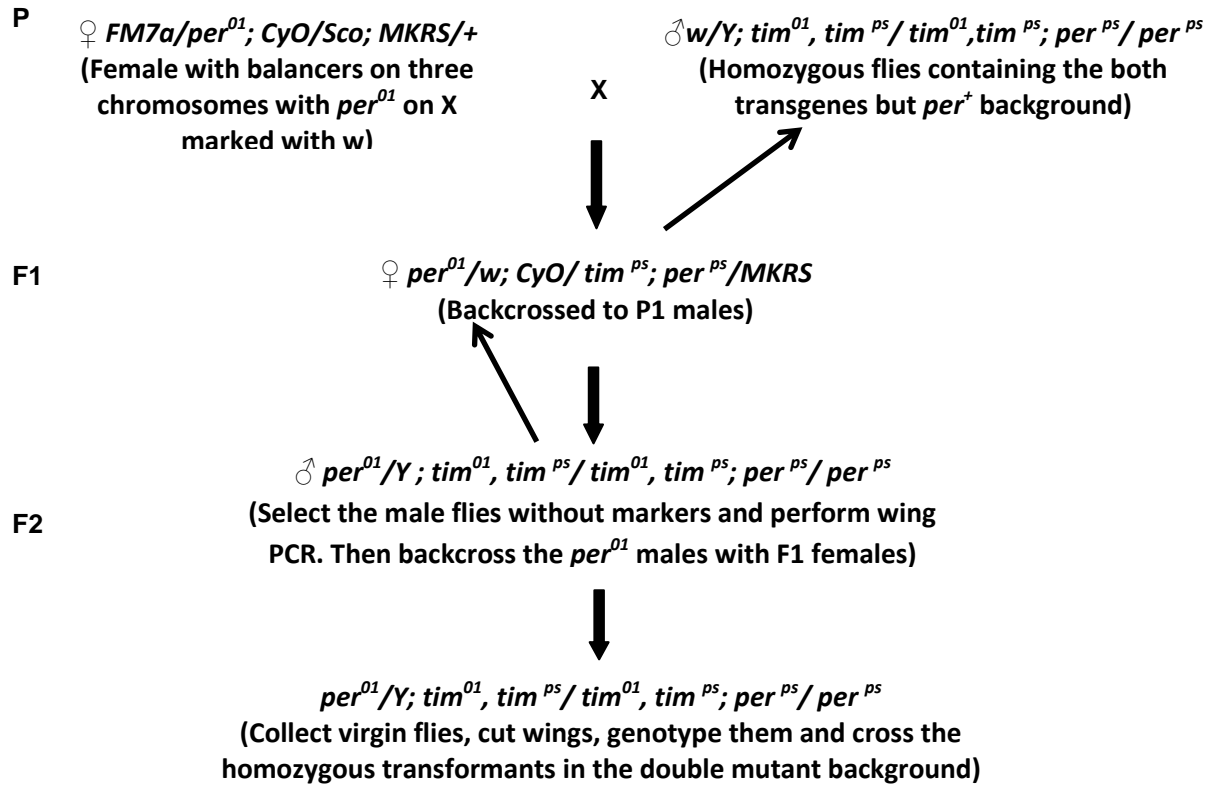

Supplement: mmc1.pdf [file mmc1.pdf]
